# Supplementary material for: Evaluation of Alternative Risk Stratification Systems in a Large Series of Solitary Fibrous Tumors with Molecular Findings and Ki-67 Index Data: Do They Improve Risk Assessment?
Source: MDPI journal article supplement (doi:10.3390/ijms24010439), 2022-12-27
Supplement: s1 [file s1]

Supplementary Table S1

| Prognostic factor    | Demicco                            |                                            | Sugita                             |                                            | G-Score                          |                                            |
|----------------------|------------------------------------|--------------------------------------------|------------------------------------|--------------------------------------------|----------------------------------|--------------------------------------------|
| Mitoses (per 10 HPF) | <u>Points</u><br>0<br>1<br>2       | <u>Value</u><br>0<br>1-3<br>≥4             |                                    |                                            | <u>Points</u><br>0<br>2          | <u>Value</u><br><4<br>≥4                   |
| Ki-67                |                                    |                                            | <u>Points</u><br>0<br>1<br>2       | <u>Value</u><br><1<br>1-10<br>≥10          |                                  |                                            |
| Age (years)          | 0<br>1                             | <55<br>≥55                                 | 0<br>1                             | <55<br>≥55                                 |                                  |                                            |
| Tumor size (cm)      | 0<br>1<br>2<br>3                   | 0-4.9<br>5-9.9<br>10-14.9<br>≥5            | 0<br>1<br>2<br>3                   | 0-4.9<br>5-9.9<br>10-14.9<br>≥5            |                                  |                                            |
| Necrosis             | 0<br>1                             | <10%<br>≥10%                               | 0<br>1                             | <10%<br>≥10%                               | 0<br>1<br>2                      | Absent<br><50%<br>≥50%                     |
| Gender               |                                    |                                            |                                    |                                            | 0<br>1                           | Female<br>Male                             |
| Scoring              | <u>Points</u><br>0-3<br>4-5<br>6-7 | <u>Risk</u><br>Low<br>Intermediate<br>High | <u>Points</u><br>0-3<br>4-5<br>6-7 | <u>Risk</u><br>Low<br>Intermediate<br>High | <u>Points</u><br>0<br>1-2<br>3-5 | <u>Risk</u><br>Low<br>Intermediate<br>High |
